# Supplementary material for: Hydrophobic shape memory poly(oxazolidone-triazine) cyclomatrix networks with high transition temperatures
Source: Royal Society of Chemistry journal article supplement (doi:10.1039/c3ra44934c), 2013-12-11
Supplement: c3ra44934c.pdf [file c3ra44934c.pdf]

### Supplementary Information

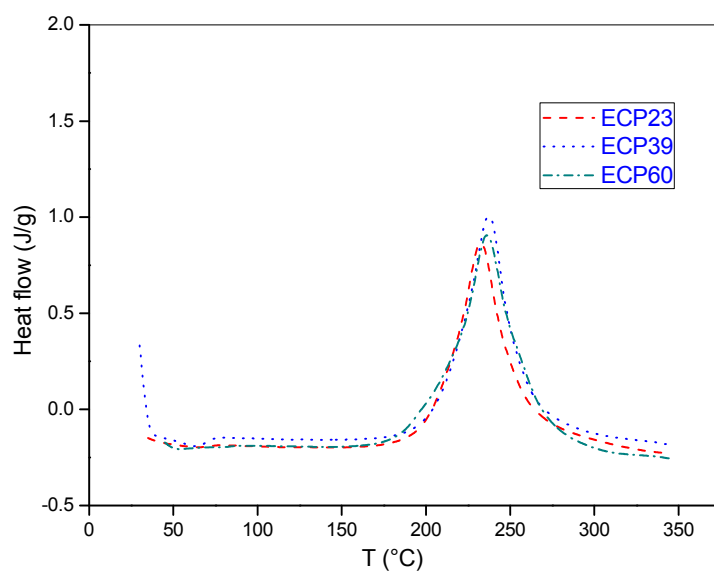

**S11:** DSC profiles of PCLD based SMP compositions (Heating rate-5 °C/min.)

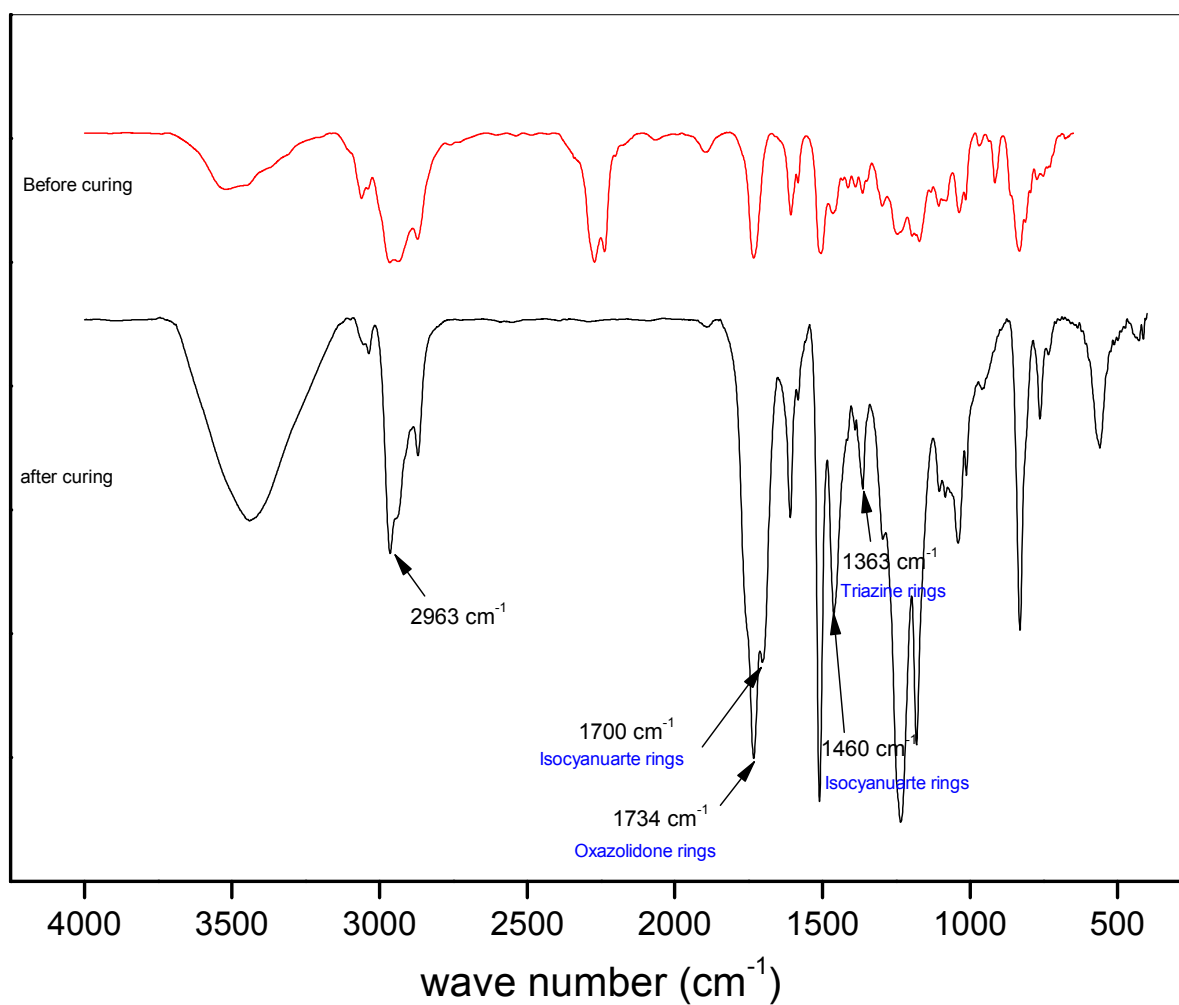

**S12:** FTIR spectra of ECP39 -before and after cross-linking

### SI3: Fold-deploy test –Testing procedure

In this test, a rectangular bar of dimension 100 x 10 x 2.5 mm<sup>3</sup> was tested for shape recovery studies. Temporary shape is made by applying a force (by hand) at T<sub>trans</sub> +20 °C and the folded structure is fixed by bringing the material to a lower temperature near to ice water temperature. The SMPs are folded at T<sub>trans</sub>+20 °C by applying a stress (hand pressure/force is enough for good SMPs) and the folded angle under this force is recorded  $\theta_{max}$ . Then, the folded shape is plunged into water (to bring into below transition temperature) by releasing the applied hand force and the corresponding angle (without force) is measured as angle fixed ( $\theta_{fix}$ ). The fixed shape was heated above the T<sub>trans</sub> (T<sub>trans</sub> +20 °C) to recover the original shape (recovered angle= $\theta_{final}$ ). By measuring the maximum angle, fixed angle and recovered angle, shape fixity and shape recovery were calculated. The experiments are repeated at least 3 times for repeatability and averages of those values are reported in the article.

$$\text{Shape fixity (\%)} = \left[ \frac{\theta_{fix}}{\theta_{max}} \right] \times 100 \quad (1)$$

$$\text{Shape recovery (\%)} = \left[ \frac{\theta_{fix} - \theta_{final}}{\theta_{fix}} \right] \times 100 \quad (2)$$

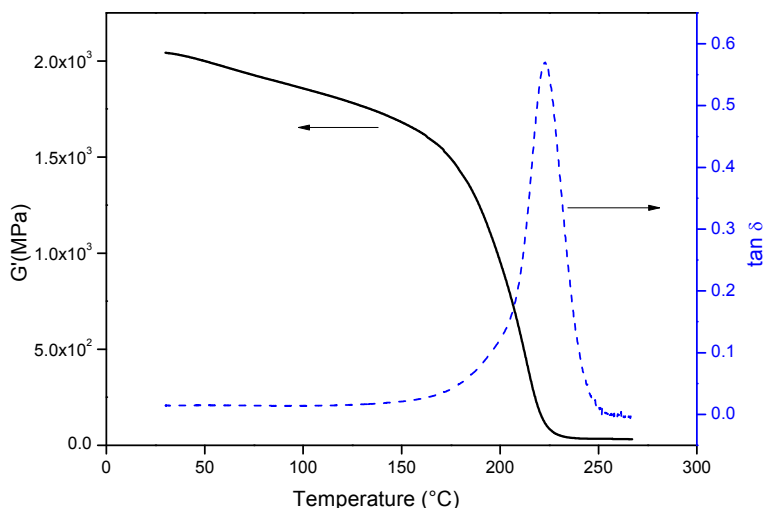

SI4: The DMA profile of ECP00 (without PCLD) indicates the transition temperature at 223 °C

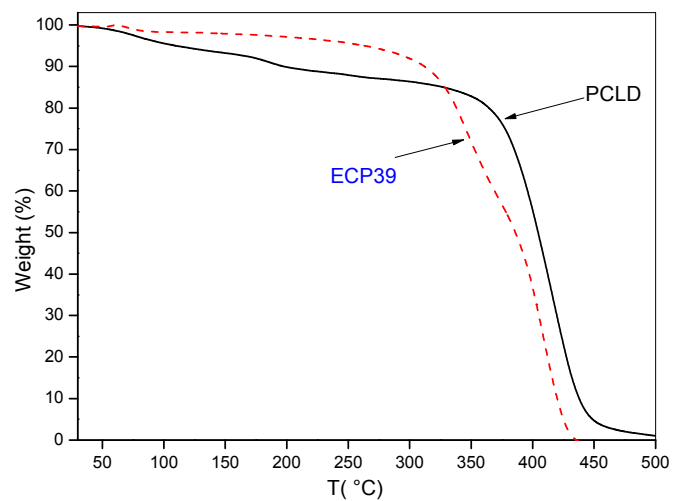

**S15:** Thermogravimetric analysis of ECP39 composition (10 °C/min., N<sub>2</sub>)
